# Supplementary material for: Flexibility of a biotinylated ligand in artificial metalloenzymes based on streptavidin—an insight from molecular dynamics simulations with classical and ab initio force fields
Source: PubMed Central journal article supplement — J Comput Aided Mol Des. 2010 Jun 5;24(9):719–32. doi: 10.1007/s10822-010-9369-x (PMC2918797; doi:10.1007/s10822-010-9369-x), 2010-06-05
Supplement: 10822_2010_9369_MOESM1_ESM.pdf [file 10822_2010_9369_MOESM1_ESM.pdf]

# **Flexibility of a biotinylated ligand in artificial metalloenzymes based on streptavidin – an insight from Molecular Dynamics simulations with classical and *ab initio* force fields**

Jarosław J. Panek<sup>1\*</sup>, Thomas R. Ward<sup>2</sup>, Aneta Jezierska-Mazzarello<sup>1,3</sup>, Marjana Novič<sup>3</sup>

<sup>1</sup>University of Wrocław, Faculty of Chemistry, ul. F. Joliot-Curie 14, 50-383 Wrocław, Poland

<sup>2</sup>University of Basel, Department of Chemistry, Spitalstrasse 51, CH-4056 Basel, Switzerland

<sup>3</sup>National Institute of Chemistry, Hajdrihova 19, SI-1001 Ljubljana, Slovenia

**\*Corresponding author:** Jarosław J. Panek, e-mail: [jarek@elrond.chem.uni.wroc.pl](mailto:jarek@elrond.chem.uni.wroc.pl), phone: +48 71 3757 246, Fax: +48 71 3282348

## **ONLINE RESOURCE 1**

**ADDITIONAL FORCE-FIELD PARAMETERS FOR THE COFACTOR  
AMBER9 FRCMOD FILE FORMAT**

**ATOMIC COORDINATES OF THE COFACTOR STRUCTURE OPTIMIZED AT  
THE DFT B3LYP/SDDAII LEVEL**

**VALIDATION OF THE COFACTOR PARAMETERS AGAINST DFT AND MP2  
DATA: STRUCTURES AND ENERGIES OF COFACTOR-WATER MOLECULE  
COMPLEXES WITH HYDROGEN BONDS**

## ADDITIONAL FORCE-FIELD PARAMETERS FOR THE COFACTOR AMBER9 FRCMOD FILE FORMAT

Ru-loaded cofactor

MASS

Fe 101.00            0.000                            ATTN: mass corresponds to Ru

BOND

|       |       |       |                    |
|-------|-------|-------|--------------------|
| Fe-cl | 200.0 | 2.478 | QM-based parameter |
| Fe-ca | 200.0 | 2.260 | QM-based parameter |
| Fe-n2 | 200.0 | 2.097 | QM-based parameter |
| Fe-n3 | 200.0 | 2.157 | QM-based parameter |

ANGLE

|          |        |         |                                    |
|----------|--------|---------|------------------------------------|
| n -c2-o  | 71.411 | 117.460 | Calculated with empirical approach |
| c3-c2-n  | 65.581 | 114.875 | Calculated with empirical approach |
| ca-s6-n2 | 38.644 | 100.845 | Calculated with empirical approach |
| ca-Fe-ca | 30.000 | 77.300  | QM-based parameter                 |
| cl-Fe-ca | 5.000  | 115.000 | QM-based parameter                 |
| Fe-ca-ha | 30.000 | 125.000 | QM-based parameter                 |
| Fe-ca-ca | 30.000 | 73.000  | QM-based parameter                 |
| hn-n3-Fe | 5.000  | 106.000 | QM-based parameter                 |
| n3-Fe-cl | 60.000 | 80.000  | QM-based parameter                 |
| n3-Fe-ca | 5.000  | 115.000 | QM-based parameter                 |
| c3-n3-Fe | 30.000 | 111.120 | QM-based parameter                 |
| c3-n2-Fe | 30.000 | 111.460 | QM-based parameter                 |
| n2-Fe-cl | 60.000 | 92.200  | QM-based parameter                 |
| n2-Fe-ca | 5.000  | 120.000 | QM-based parameter                 |
| n2-Fe-n3 | 30.000 | 78.400  | QM-based parameter                 |
| s6-n2-Fe | 30.000 | 120.000 | QM-based parameter                 |

DIHE

|             |   |       |         |       |             |
|-------------|---|-------|---------|-------|-------------|
| ca-Fe-ca-ca | 1 | 1.500 | 60.000  | 3.000 | Generalized |
| ca-Fe-ca-ha | 1 | 1.500 | 180.000 | 2.000 | Generalized |
| cl-Fe-ca-ha | 1 | 0.050 | 180.000 | 2.000 | Generalized |
| cl-Fe-ca-ca | 1 | 0.050 | 180.000 | 2.000 | Generalized |
| hn-n3-Fe-n2 | 1 | 1.500 | 120.000 | 3.000 | Generalized |
| hn-n3-Fe-cl | 1 | 0.050 | 120.000 | 3.000 | Generalized |
| hn-n3-Fe-ca | 1 | 0.050 | 180.000 | 6.000 | Generalized |
| n3-Fe-ca-ca | 1 | 0.050 | 180.000 | 6.000 | Generalized |
| n3-Fe-ca-ha | 1 | 0.050 | 180.000 | 6.000 | Generalized |
| c3-n3-Fe-n2 | 1 | 1.500 | 180.000 | 2.000 | Generalized |
| c3-n3-Fe-ca | 1 | 0.050 | 180.000 | 6.000 | Generalized |
| c3-n3-Fe-cl | 1 | 0.050 | 120.000 | 6.000 | Generalized |
| c3-n2-Fe-n3 | 1 | 1.500 | 180.000 | 2.000 | Generalized |
| c3-n2-Fe-ca | 1 | 0.050 | 180.000 | 6.000 | Generalized |
| c3-n2-Fe-cl | 1 | 0.050 | 120.000 | 6.000 | Generalized |
| n2-Fe-ca-ca | 1 | 0.050 | 180.000 | 6.000 | Generalized |
| n2-Fe-ca-ha | 1 | 0.050 | 180.000 | 6.000 | Generalized |
| s6-n2-Fe-cl | 1 | 0.500 | 180.000 | 6.000 | Generalized |
| s6-n2-Fe-ca | 1 | 0.050 | 180.000 | 6.000 | Generalized |
| s6-n2-Fe-n3 | 1 | 0.050 | 180.000 | 6.000 | Generalized |

IMPROPER

|             |     |       |     |               |
|-------------|-----|-------|-----|---------------|
| n -n -c2-o  | 1.1 | 180.0 | 2.0 | default value |
| c3-n -c2-o  | 1.1 | 180.0 | 2.0 | default value |
| c2-ca-n -hn | 1.1 | 180.0 | 2.0 | General impr. |
| ca-ca-ca-n  | 1.1 | 180.0 | 2.0 | default value |
| ca-ca-ca-ha | 1.1 | 180.0 | 2.0 | General impr. |
| ca-ca-ca-s6 | 1.1 | 180.0 | 2.0 | default value |

NONBON

Fe            1.1000    0.0125                            ATTN: taken from Zn

ATOMIC COORDINATES OF THE COFACTOR STRUCTURE OPTIMIZED AT  
THE DFT B3LYP/SDDAII LEVEL

|      |    |     |     |   |        |        |        |      |      |
|------|----|-----|-----|---|--------|--------|--------|------|------|
| ATOM | 1  | N1  | CMN | 1 | 10.053 | -2.433 | 0.303  | 1.00 | 0.00 |
| ATOM | 2  | H1  | CMN | 1 | 10.776 | -2.810 | 0.892  | 1.00 | 0.00 |
| ATOM | 3  | C1  | CMN | 1 | 10.335 | -1.458 | -0.632 | 1.00 | 0.00 |
| ATOM | 4  | O1  | CMN | 1 | 11.451 | -0.952 | -0.878 | 1.00 | 0.00 |
| ATOM | 5  | N2  | CMN | 1 | 9.138  | -1.170 | -1.262 | 1.00 | 0.00 |
| ATOM | 6  | H2  | CMN | 1 | 9.105  | -0.520 | -2.028 | 1.00 | 0.00 |
| ATOM | 7  | C4  | CMN | 1 | 7.992  | -1.929 | -0.765 | 1.00 | 0.00 |
| ATOM | 8  | H4  | CMN | 1 | 7.562  | -2.544 | -1.566 | 1.00 | 0.00 |
| ATOM | 9  | C2  | CMN | 1 | 8.648  | -2.837 | 0.357  | 1.00 | 0.00 |
| ATOM | 10 | H3  | CMN | 1 | 8.542  | -3.901 | 0.111  | 1.00 | 0.00 |
| ATOM | 11 | C3  | CMN | 1 | 7.983  | -2.564 | 1.720  | 1.00 | 0.00 |
| ATOM | 12 | H5  | CMN | 1 | 7.129  | -3.226 | 1.885  | 1.00 | 0.00 |
| ATOM | 13 | H6  | CMN | 1 | 8.686  | -2.663 | 2.548  | 1.00 | 0.00 |
| ATOM | 14 | S1  | CMN | 1 | 7.356  | -0.767 | 1.680  | 1.00 | 0.00 |
| ATOM | 15 | C5  | CMN | 1 | 6.858  | -1.062 | -0.158 | 1.00 | 0.00 |
| ATOM | 16 | H7  | CMN | 1 | 5.946  | -1.669 | -0.122 | 1.00 | 0.00 |
| ATOM | 17 | C6  | CMN | 1 | 6.581  | 0.249  | -0.894 | 1.00 | 0.00 |
| ATOM | 18 | H8  | CMN | 1 | 7.477  | 0.880  | -0.855 | 1.00 | 0.00 |
| ATOM | 19 | H9  | CMN | 1 | 6.397  | 0.014  | -1.953 | 1.00 | 0.00 |
| ATOM | 20 | C7  | CMN | 1 | 5.371  | 1.028  | -0.344 | 1.00 | 0.00 |
| ATOM | 21 | H10 | CMN | 1 | 4.488  | 0.375  | -0.356 | 1.00 | 0.00 |
| ATOM | 22 | 1H1 | CMN | 1 | 5.556  | 1.288  | 0.707  | 1.00 | 0.00 |
| ATOM | 23 | C8  | CMN | 1 | 5.079  | 2.307  | -1.148 | 1.00 | 0.00 |
| ATOM | 24 | 2H1 | CMN | 1 | 5.959  | 2.962  | -1.133 | 1.00 | 0.00 |
| ATOM | 25 | 3H1 | CMN | 1 | 4.881  | 2.053  | -2.195 | 1.00 | 0.00 |
| ATOM | 26 | C9  | CMN | 1 | 3.868  | 3.097  | -0.604 | 1.00 | 0.00 |
| ATOM | 27 | H14 | CMN | 1 | 4.028  | 3.348  | 0.452  | 1.00 | 0.00 |
| ATOM | 28 | H15 | CMN | 1 | 3.780  | 4.044  | -1.150 | 1.00 | 0.00 |
| ATOM | 29 | C10 | CMN | 1 | 2.562  | 2.339  | -0.799 | 1.00 | 0.00 |
| ATOM | 30 | O2  | CMN | 1 | 2.236  | 1.870  | -1.914 | 1.00 | 0.00 |
| ATOM | 31 | N3  | CMN | 1 | 1.779  | 2.218  | 0.332  | 1.00 | 0.00 |
| ATOM | 32 | H16 | CMN | 1 | 2.156  | 2.624  | 1.178  | 1.00 | 0.00 |
| ATOM | 33 | C11 | CMN | 1 | 0.516  | 1.593  | 0.483  | 1.00 | 0.00 |
| ATOM | 34 | C14 | CMN | 1 | -0.068 | 1.632  | 1.764  | 1.00 | 0.00 |
| ATOM | 35 | C15 | CMN | 1 | -1.310 | 1.041  | 1.996  | 1.00 | 0.00 |
| ATOM | 36 | H20 | CMN | 1 | -1.775 | 1.047  | 2.974  | 1.00 | 0.00 |
| ATOM | 37 | H19 | CMN | 1 | 0.453  | 2.121  | 2.583  | 1.00 | 0.00 |
| ATOM | 38 | C12 | CMN | 1 | -0.154 | 0.949  | -0.576 | 1.00 | 0.00 |
| ATOM | 39 | H17 | CMN | 1 | 0.302  | 0.916  | -1.555 | 1.00 | 0.00 |
| ATOM | 40 | C13 | CMN | 1 | -1.397 | 0.353  | -0.340 | 1.00 | 0.00 |
| ATOM | 41 | H18 | CMN | 1 | -1.918 | -0.155 | -1.142 | 1.00 | 0.00 |
| ATOM | 42 | C16 | CMN | 1 | -1.954 | 0.418  | 0.933  | 1.00 | 0.00 |
| ATOM | 43 | S2  | CMN | 1 | -3.611 | -0.427 | 1.279  | 1.00 | 0.00 |
| ATOM | 44 | O3  | CMN | 1 | -3.455 | -2.003 | 0.741  | 1.00 | 0.00 |
| ATOM | 45 | O4  | CMN | 1 | -3.864 | -0.187 | 2.913  | 1.00 | 0.00 |
| ATOM | 46 | N4  | CMN | 1 | -4.741 | 0.428  | 0.054  | 1.00 | 0.00 |
| ATOM | 47 | C23 | CMN | 1 | -4.767 | 1.891  | 0.371  | 1.00 | 0.00 |
| ATOM | 48 | C24 | CMN | 1 | -5.597 | 2.491  | -0.756 | 1.00 | 0.00 |
| ATOM | 49 | N5  | CMN | 1 | -6.917 | 1.769  | -0.780 | 1.00 | 0.00 |
| ATOM | 50 | H29 | CMN | 1 | -7.412 | 1.911  | -1.659 | 1.00 | 0.00 |
| ATOM | 51 | H30 | CMN | 1 | -7.508 | 2.061  | 0.006  | 1.00 | 0.00 |
| ATOM | 52 | 3H2 | CMN | 1 | -5.745 | 3.568  | -0.617 | 1.00 | 0.00 |
| ATOM | 53 | H24 | CMN | 1 | -5.106 | 2.317  | -1.716 | 1.00 | 0.00 |
| ATOM | 54 | 1H2 | CMN | 1 | -5.222 | 2.106  | 1.344  | 1.00 | 0.00 |
| ATOM | 55 | 2H2 | CMN | 1 | -3.754 | 2.315  | 0.350  | 1.00 | 0.00 |
| ATOM | 56 | Fe1 | CMN | 1 | -6.671 | -0.317 | -0.289 | 1.00 | 0.00 |
| ATOM | 57 | C11 | CMN | 1 | -7.494 | 0.545  | 1.884  | 1.00 | 0.00 |
| ATOM | 58 | C19 | CMN | 1 | -7.347 | -2.411 | 0.201  | 1.00 | 0.00 |
| ATOM | 59 | H26 | CMN | 1 | -7.447 | -2.790 | 1.210  | 1.00 | 0.00 |
| ATOM | 60 | C18 | CMN | 1 | -6.104 | -2.517 | -0.455 | 1.00 | 0.00 |

|      |    |     |     |   |         |        |        |      |      |
|------|----|-----|-----|---|---------|--------|--------|------|------|
| ATOM | 61 | H27 | CMN | 1 | -5.250  | -2.937 | 0.060  | 1.00 | 0.00 |
| ATOM | 62 | C17 | CMN | 1 | -5.906  | -1.922 | -1.755 | 1.00 | 0.00 |
| ATOM | 63 | C26 | CMN | 1 | -4.575  | -2.030 | -2.444 | 1.00 | 0.00 |
| ATOM | 64 | 1H3 | CMN | 1 | -4.500  | -2.995 | -2.962 | 1.00 | 0.00 |
| ATOM | 65 | 2H3 | CMN | 1 | -4.442  | -1.236 | -3.185 | 1.00 | 0.00 |
| ATOM | 66 | 3H3 | CMN | 1 | -3.768  | -1.977 | -1.708 | 1.00 | 0.00 |
| ATOM | 67 | C22 | CMN | 1 | -6.997  | -1.226 | -2.335 | 1.00 | 0.00 |
| ATOM | 68 | H28 | CMN | 1 | -6.868  | -0.741 | -3.297 | 1.00 | 0.00 |
| ATOM | 69 | C21 | CMN | 1 | -8.283  | -1.171 | -1.683 | 1.00 | 0.00 |
| ATOM | 70 | H25 | CMN | 1 | -9.089  | -0.631 | -2.162 | 1.00 | 0.00 |
| ATOM | 71 | C20 | CMN | 1 | -8.486  | -1.765 | -0.418 | 1.00 | 0.00 |
| ATOM | 72 | C25 | CMN | 1 | -9.814  | -1.745 | 0.321  | 1.00 | 0.00 |
| ATOM | 73 | H34 | CMN | 1 | -9.574  | -1.602 | 1.381  | 1.00 | 0.00 |
| ATOM | 74 | C28 | CMN | 1 | -10.749 | -0.595 | -0.095 | 1.00 | 0.00 |
| ATOM | 75 | H35 | CMN | 1 | -11.640 | -0.599 | 0.539  | 1.00 | 0.00 |
| ATOM | 76 | H36 | CMN | 1 | -10.254 | 0.372  | 0.030  | 1.00 | 0.00 |
| ATOM | 77 | H37 | CMN | 1 | -11.086 | -0.696 | -1.134 | 1.00 | 0.00 |
| ATOM | 78 | C27 | CMN | 1 | -10.515 | -3.119 | 0.160  | 1.00 | 0.00 |
| ATOM | 79 | H38 | CMN | 1 | -11.432 | -3.145 | 0.759  | 1.00 | 0.00 |
| ATOM | 80 | H39 | CMN | 1 | -10.785 | -3.298 | -0.888 | 1.00 | 0.00 |
| ATOM | 81 | H40 | CMN | 1 | -9.870  | -3.940 | 0.489  | 1.00 | 0.00 |

## VALIDATION OF THE COFACTOR PARAMETERS AGAINST DFT AND MP2 DATA: STRUCTURES AND ENERGIES OF COFACTOR-WATER MOLECULE COMPLEXES WITH HYDROGEN BONDS

Note to the validation:

- Only those bond and angle parameters were created from the QM data, which were missing from the GAFF extension to the standard AMBER ff99SB force field. Dihedrals were adapted from the GAFF force field by analogy. Properties of the AMBER suite necessitated substituting iron (Fe symbol) instead of ruthenium in the topology files.
- The tables and figures below show different contacts between probe molecule (water) and the metal-bearing cofactor. Interaction energies were calculated at the B3LYP/SDDAll, MP2/SDDAll quantum-chemical levels and at the classical force field level. Donor-acceptor distances are given in Å, and the energies in kcal/mol.

### TEST 1 – WATER AND UREIDO MOIETY, SIDE 1

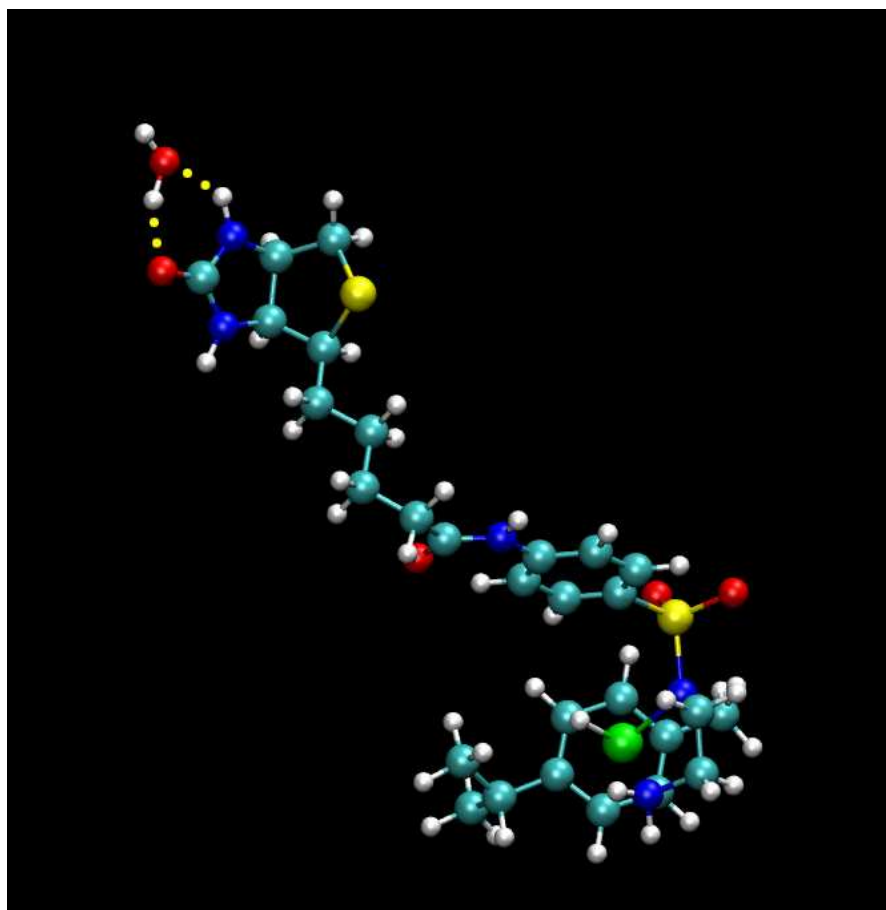

| ENERGY |        |        | DFT      |          | AMBER    |          |
|--------|--------|--------|----------|----------|----------|----------|
| B3LYP  | MP2    | AMBER  | OW-H...O | N-H...OW | OW-H...O | N-H...OW |
| -15.18 | -14.70 | -10.49 | 2.669    | 2.764    | 2.694    | 2.930    |

## TEST 2 – WATER AND UREIDO MOIETY, SIDE 2

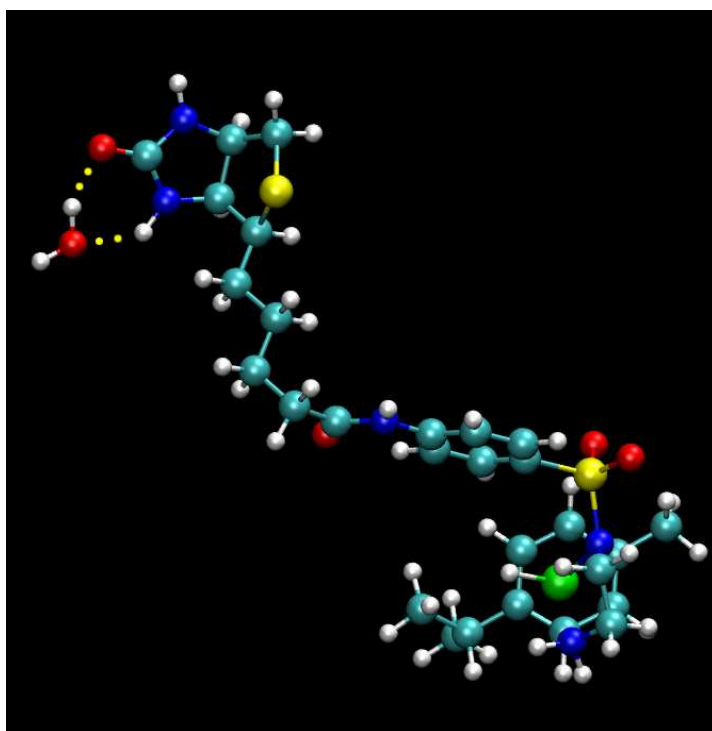

| ENERGY |        |        | DFT      |          | AMBER    |          |
|--------|--------|--------|----------|----------|----------|----------|
| B3LYP  | MP2    | AMBER  | OW-H...O | N-H...OW | OW-H...O | N-H...OW |
| -15.55 | -14.98 | -12.03 | 2.665    | 2.765    | 2.693    | 2.946    |

Donor-acceptor distances are given in Å, and the energies in kcal/mol.

### TEST 3 – WATER AND –SO<sub>2</sub>– MOIETY

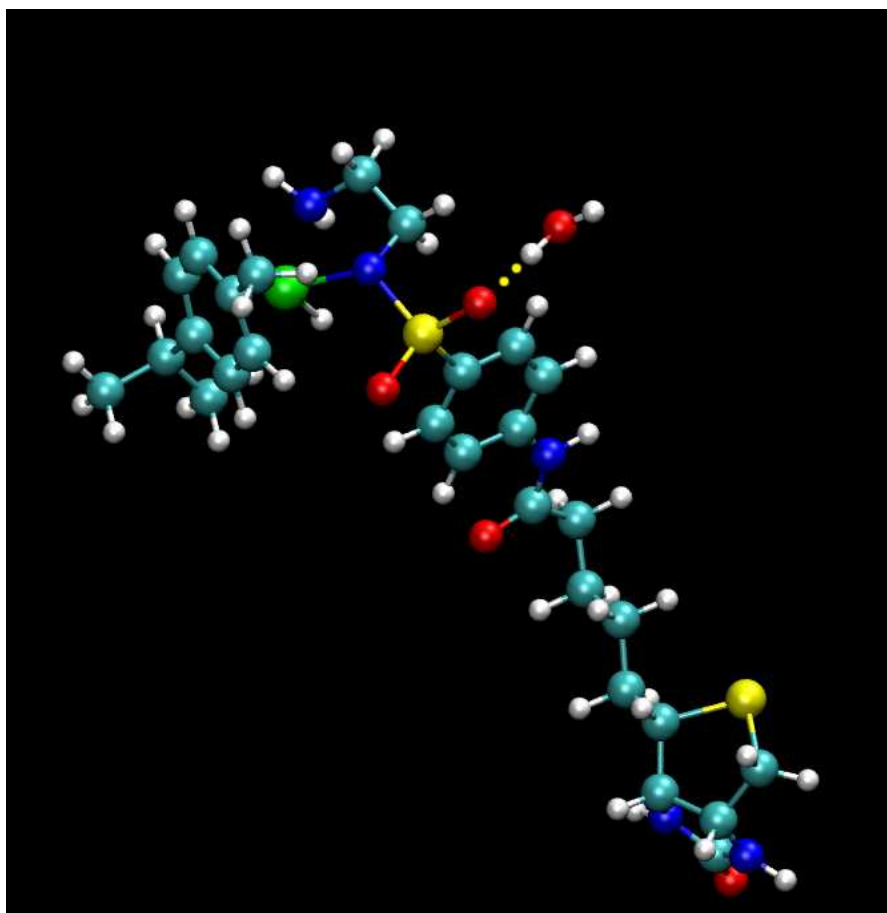

| ENERGY |        |       | DFT        | AMBER      |
|--------|--------|-------|------------|------------|
| B3LYP  | MP2    | AMBER | OW-H...O=S | OW-H...O=S |
| -13.20 | -15.11 | -9.82 | 2.668      | 2.670      |

Donor-acceptor distances are given in Å, and the energies in kcal/mol.

## TEST 4 – WATER AND –NH<sub>2</sub>– MOIETY AT THE METAL

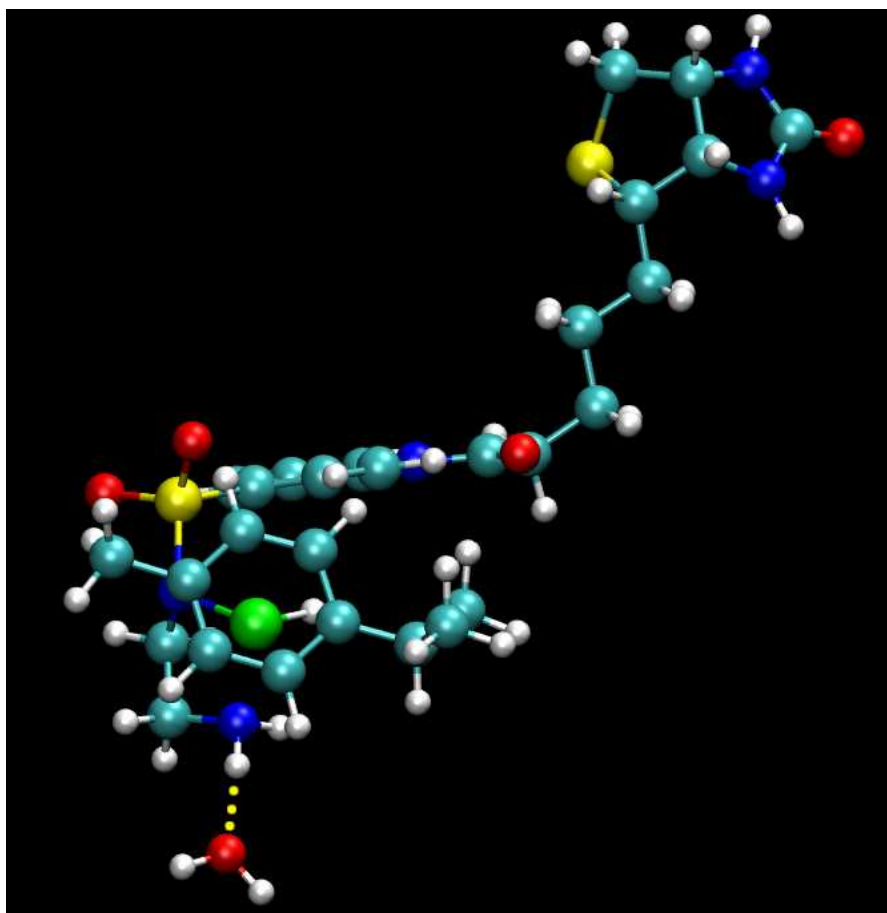

| ENERGY |       |       | DFT        | AMBER      |
|--------|-------|-------|------------|------------|
| B3LYP  | MP2   | AMBER | OW-H...O=S | OW-H...O=S |
| -7.51  | -8.94 | -8.50 | 2.964      | 2.994      |

Donor-acceptor distances are given in Å, and the energies in kcal/mol.

### SHORT ANALYSIS OF THE TESTS

The tests indicate that the force field reproduces very well structures of the hydrogen-bonded complexes with water, if we take into account limitations of the classical force fields. While O...O bonds are reproduced indeed well, those involving nitrogen are too long by ca. 0.2Å. Interaction energy values also indicate that the classical force field reproduces the strength of hydrogen bonding at least semi-quantitatively. MP2 calculations show that the DFT level used in this study provides sufficient accuracy to model the studied hydrogen bonds.
